# 1 Deep learning-based methods for individual 2 recognition in small birds

3 André C. Ferreira<sup>a,b\*</sup>, Liliana R. Silva<sup>b</sup>, Francesco Renna<sup>c</sup>, Hanja B. Brandl<sup>d,e,f</sup>, Julien P.  
4 Renoult<sup>a</sup>, Damien R. Farine<sup>d,e,f</sup>, Rita Covas<sup>b,g</sup> and Claire Doutrelant<sup>a,g</sup>

5 <sup>a</sup>Centre of Evolutionary and Functional Ecology (CEFE UMR5175, CNRS—University of  
6 Montpellier—University Paul-Valéry Montpellier—EPHE), 1919 route de Mende, 34293

7 <sup>b</sup>CIBIO-InBio, Research Centre in Biodiversity and Genetic Resources, Campus Agrário de  
8 Vairão, Vairão,

9 <sup>c</sup>Instituto de Telecomunicações, Faculdade de Ciências da Universidade do Porto, Rua do  
10 Campo Alegre 1021/1055, 4169-007 Porto, Portugal

11 <sup>d</sup>Department of Collective Behavior, Max Planck Institute of Animal Behavior, Konstanz,  
12 Germany

13 <sup>e</sup>Center for the Advanced Study of Collective Behaviour, University of Konstanz, Germany

14 <sup>f</sup>Department of Biology, University of Konstanz, Germany

15 <sup>g</sup>FitzPatrick Institute of African Ornithology, DST-NRF Centre of Excellence, University of  
16 Cape Town, Rondebosch 7701, South Africa

17  
18 \* Correspondence:

19 Email: [andremcferreira@cibio.up.pt](mailto:andremcferreira@cibio.up.pt)

## 20 ABSTRACT

21 1. Individual identification is a crucial step to answer many questions in evolutionary  
22 biology and is mostly performed by marking animals with tags. Such methods are

23 well established but often make data collection and analyses time consuming and  
24 consequently are not suited for collecting very large datasets.

25 2. Recent technological and analytical advances, such as deep learning, can help  
26 overcome these limitations by automatizing data collection and analysis. Currently  
27 one of the bottlenecks preventing the application of deep learning for individual  
28 identification is the need of hundreds to thousands of labelled pictures required for  
29 training convolutional neural networks (CNNs).

30 3. Here, we describe procedures that improve data collection and allow individual  
31 identification in captive and wild birds and we apply it to three small bird species, the  
32 sociable weaver *Philetairus socius*, the great tit *Parus major* and the zebra finch  
33 *Taeniopygia guttata*.

34 4. First, we present an automated method that allows the collection of large samples of  
35 individually labelled images. Second, we describe how to train a CNN to identify  
36 individuals. Third, we illustrate the general applicability of CNN for individual  
37 identification in animal studies by showing that the trained CNN can predict the  
38 identity of birds from images collected in contexts that differ from the ones originally  
39 used to train the CNNs. Fourth, we present a potential solution to solve the issues of  
40 new incoming individuals.

41 5. Overall our work demonstrates the feasibility of applying state-of-the-art deep  
42 learning tools for individual identification of birds, both in the lab and in the wild.  
43 These techniques are made possible by our approaches that allow efficient collection  
44 of training data. The ability to conduct individual identification of birds without  
45 requiring external markers that can be visually identified by human observers  
46 represents a major advance over current methods.

47

48 **Keywords:** artificial intelligence, automated, convolutional neural networks, birds,  
49 data collection, deep learning, individual identification

## 50 INTRODUCTION

51 In recent years, artificial intelligence techniques, such as convolutional neural network  
52 (CNN), have caught the attention of ecologists. Such tools can automatize the analysis of  
53 various types of data, ranging from species abundance to behaviours, and from different  
54 sources such as pictures or audio recordings (reviewed in Christin, Hervet & Lecomte,  
55 2019). CNNs are a class of deep neural networks that, contrary to other types of artificial  
56 intelligence methods that require hand-crafted feature extraction, automatically learn from  
57 the data the features that are optimal for solving a given classification problem (see  
58 Angermueller, Pärnamaa, Parts & Stegle, 2016; Christin et al., 2019; Jordan & Mitchell,  
59 2015; LeCun, Bengio & Hinton, 2015 for a detailed introduction on deep learning). CNNs are  
60 thus particularly useful when many features for classification are needed.

61 In ecology, deep learning has been successfully and predominantly applied to identifying  
62 and counting animal or plant species from pictures. For example, Norouzzadeh et al. (2018)  
63 used a long term database of more than 3 million labelled pictures to train a CNN to  
64 automatically recognize 48 African animal species. This CNN can replace the need of  
65 human manual identification in future studies, thus promoting a more efficient data analysis.  
66 This and other examples (e.g. Rzanny, Seeland, Wäldchen & Mäder, 2017; Tabak et al.,  
67 2019) highlight the potentialities of deep learning for reducing human effort and increasing  
68 identification performance. Beyond species recognition, another promising application of  
69 CNNs is individual identification, which is crucial to many studies in ecology, behaviour and  
70 conservation (Clutton-Brock & Sheldon, 2010). Individual identification using deep learning  
71 has been the subject of extensive research in humans (e.g. Ranjan et al., 2018), and  
72 recently a handful of studies have applied it to other animal species (e.g. primates, Deb et  
73 al., 2018; pigs, Hansen et al., 2018; elephants, Körschens, Barz & Denzler, 2018). However,  
74 the application of deep learning to smaller taxa, and specifically birds, remains unexplored.

75 In birds, manual examination of pictures or video recordings of visually marked populations  
76 (e.g. using colour rings), are well established methods. However, relying on humans for  
77 individual identification and data collection is time consuming (Weinstein, 2018). In many  
78 cases the use of recently developed animal-tracking devices (e.g. GPS) and sensor  
79 technologies (e.g. RFID) can be used (reviewed in Krause et al., 2013). Yet, animal-borne  
80 tracking devices are also often limited when visual information on contexts and behaviours  
81 are important. For example, studying parental care in birds requires video recordings to  
82 visually identify which birds are providing care to the chicks and how often they do it, as well  
83 as to identify several other relevant behaviours and attributes, such as the type of food that  
84 parents are bringing to the chicks or distinguishing the purpose of the visit (e.g. to feed the  
85 chicks or to engage in nest maintenance activities). Thus, a major advance over current  
86 methods would be to automatically identify individuals while keeping the versatility of  
87 pictures and video recordings for behavioural data collection (which should in turn be  
88 automatized as well).

89 Several methods for automatic individual identification and other data extraction from  
90 pictures and videos of animals have been developed previously. For instance, Pérez-  
91 Escudero, Vicente-Page, Hinz, Arganda & de Polavieja (2014) proposed a multi-tracking  
92 algorithm capable of following unmarked fish in captivity from video recordings (which was  
93 later improved using deep learning; Romero-Ferrero, Bergomi, Hinz, Heras, & de Polavieja,  
94 2019), whereas other computer vision-based methods that require tags or marks to assist  
95 with computer tracking and identification have been developed and applied in behavioural  
96 captivity studies (e.g. Alarcón-Nieto et al., 2018). However, these methods are mostly limited  
97 to animals in captivity, either because they require standardized recording conditions (e.g.  
98 consistent background light, known number of individuals present in the recording) or the  
99 marks needed to assist identification are attached through gluing or through backpacks that  
100 are not suitable to be fitted to many animals, especially in the wild. Deep learning has the  
101 potential to overcome some of the limitations of the current automated methods, as it can

102 identify individuals by relying only on their natural variance in appearance and be tolerant to  
103 spurious variation in the recording conditions.

104 A major challenge for the application of individual recognition using deep learning methods is  
105 the need of collecting extensive training data. Acquiring training data typically involves  
106 labelling images with the location and/or identity (or an attribute) of each individual. The  
107 amount of data required to train a CNN is expected to be proportionally dependent on the  
108 difficulty of the classification challenge, i.e. a bear and a bird would be easier to differentiate  
109 than two bears of the same species. Usually CNNs that achieve large generalization  
110 capability are trained over thousands to millions of pictures (Marcus, 2018). Such large  
111 datasets are required as usually CNNs have to generalize from the specific data that they  
112 have been exposed to during training. For example, if a CNN was trained to distinguish two  
113 bears of the same species with only pictures of the individuals lying down, difficulties may  
114 arise to identify those same individuals from new pictures taken when the animals were  
115 standing up. Additionally, if the pictures used for training were taken during a short period of  
116 time, it might lead the CNN to rely on superficial and temporary features for identification.  
117 For example, if pictures for training were taken when one of the individuals had a large  
118 wound or was going through moulting or shedding, it might result in a CNN that relies on  
119 those salient and temporary features and perform badly when predicting the identity of the  
120 individuals a few days later. Therefore, effectively making use of deep learning for individual  
121 identification, especially in the wild, requires an adaptive framework for collecting training  
122 data.

123 When working in captivity settings, such large labelled image datasets can be easily  
124 collected by temporarily and routinely isolating the animals in enclosures separated from the  
125 rest of the group while filming or photographing them. However for researchers working on  
126 wild populations collecting training data can become challenging and it might not be feasible  
127 to rely on traditional methods of individual identification for labelling the pictures. For  
128 example, in birds, relying on human observers and colour rings, to photograph and manually

129 label enough pictures to implement CNN for individual identification, can become extremely  
130 costly and time-consuming. Furthermore, in longer-term studies, animals can change their  
131 appearance over time (e.g. changing from juvenile to adult plumage in birds) or new  
132 individuals may join the population (e.g. immigrants or recruited offspring). These cases  
133 require that the process of identifying individuals and labelling photos is routinely repeated.  
134 Therefore, relying on human observers for collecting labelled data in this type of systems  
135 might hinder the implementation of deep learning techniques for individual identification, or  
136 restrict its application to short-term projects.

137 Here, we provide guidance on how training data can be efficiently collected, both in captivity  
138 and in the wild, and on the subsequent steps required to train a CNN for individual  
139 identification. We demonstrate the feasibility of our approaches using data from two wild pit-  
140 tagged populations of birds from two different species, the sociable weaver *Philetairus*  
141 *socius* and the great tit *Parus major*, and a population of captive zebra finches *Taeniopygia*  
142 *guttata*.

143 We start by 1) focusing on the problem of efficiently collecting large training datasets. We  
144 provide simple and automated methods for collecting a very large number of labelled  
145 pictures by using RFID tags associated to camera traps (in the wild sociable weaver and the  
146 great tit populations) or by temporarily isolating the target individuals (in captive zebra  
147 finches). In all cases, we used low-cost RFIDs and low-cost cameras that can be programmed  
148 to take labelled pictures of the birds' back feathers. 2) We provide details of the data pre-  
149 processing and the training of an adequate CNN. 3) Subsequently, we evaluate the  
150 generalization performance of our CNNs to other circumstances by evaluating the ability of  
151 our models to predict the identity of the birds in pictures collected with different cameras and  
152 in contexts that differ from the ones used for collecting the training datasets. 4) Finally, we  
153 present a very simple approach to address the problems arising from the arrival of new and  
154 unmarked individuals to the population.

155 **METHODS:**

156 **Study populations:**

157 We collected pictures from a population of sociable weavers at Benfontein Nature Reserve  
158 in Kimberley, South Africa. For the great tits, pictures were collected from a population in  
159 Möggingen, southern Germany. For both species, birds were fitted with pit-tags as nestlings,  
160 or when trapped in mist-nets as adults and are habituated to artificial feeders that are fitted  
161 with RFID antennas, as part of two independent on-going studies in these populations. For  
162 the zebra finches, pictures were collected from a captive population housed in Möggingen,  
163 southern Germany. Birds were being kept in indoor cages in pairs and small flocks.

164 **Collecting training data:**

165 **Sociable weavers:**

166 The collection of labelled pictures was automated by combining RFID technology  
167 (Priority1Design, Australia) with single-board computers (Raspberry Pi), cameras and  
168 artificial feeders. We fitted RFID antenna to small perches placed in front of plastic feeders  
169 filled with mixed seeds (Fig. 1a). Each RFID data logger was connected to a Raspberry Pi  
170 (detailed explanation of the developed setup is available at  
171 [github.com/AndreCFerreira/Bird\\_individualID](https://github.com/AndreCFerreira/Bird_individualID)) which was connected to a Pi camera (we used  
172 Pi camera V1 5mp and V2 8mp). We programmed the Raspberry Pi to take a picture every  
173 time that a bird was detected on the RFID logger, with a 2 seconds gap between pictures.  
174 This interval was introduced in order to avoid having near-identical frames of the same bird  
175 that would increase overfitting of the CNN and jeopardize the generalization capability of the  
176 models (see “Convolutional neural networks” section). The Raspberry Pi was programmed to  
177 take pictures with different shutter speeds to account for variation in light conditions over the  
178 day. Each picture file was automatically labelled with the bird identity, known from the RFID  
179 logger and the time of shooting in the filename. Training data collection is therefore

180 automatized by automatically linking the identity of the bird perching on the antenna while  
181 feeding to its pictures, without the need of human manual identification and annotation.

182 Three Pi cameras and three feeders which were ca. two meters apart from each other were  
183 used. The cameras were positioned to take a picture from top perspective to enable to  
184 photograph both the scaled pattern of the back and wing feathers (Fig. 1b). The birds' back  
185 was chosen as the distinctive mark since it is the body part that is most easily observed and  
186 recorded in multiple contexts (e.g. when perching at the feeders or building at the nest),  
187 making it a very versatile mark for applying an image classification algorithm in other  
188 contexts. Pictures were collected for 15 days during November and December 2018.

(a)

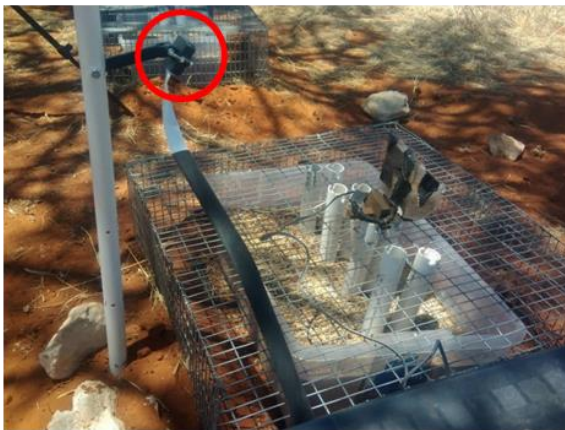

(b)

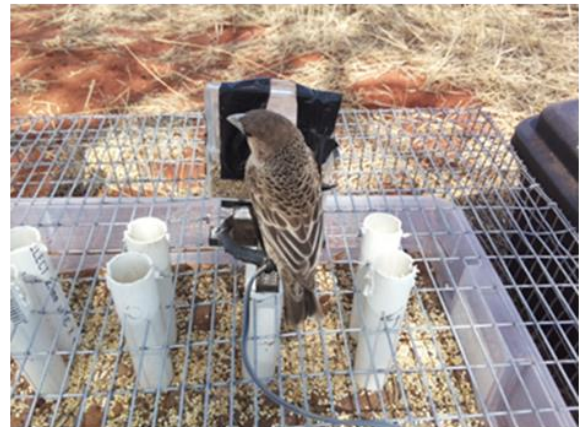

(c)

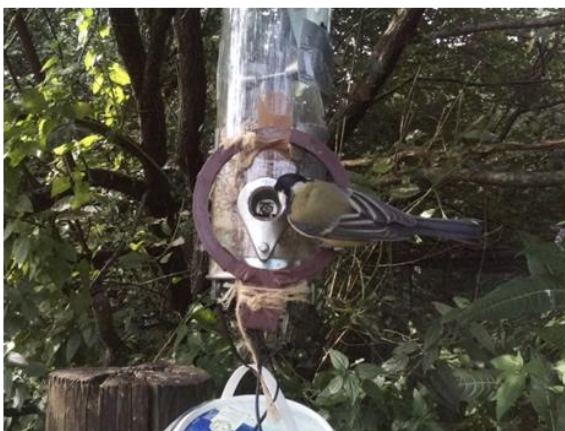

(d)

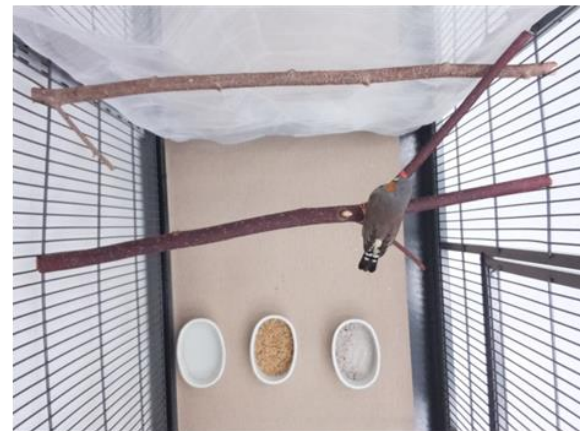

189

190 Figure 1. a) Pi camera (circled in red) positioned to record the back of the birds and b) the  
191 respective picture taken of a sociable weaver feeding while perched on the RFID antenna. c)



192 Picture taken by the Pi camera of a great tit perching at the RFID antenna on a feeder and d)  
193 of a male zebra finch taken from inside the cage.

194 Great tits:

195 We collected pictures of the individuals using a similar setup to the one described above, by  
196 placing a RFID antenna at an artificial feeder hanging on a tree branch (Fig. 1c). We used  
197 one single Pi camera and one feeder to collect pictures during seven days over the course of  
198 the last two weeks of August 2019.

199 Zebra finches:

200 We temporarily divided aviaries into equally-sized partitions with a net to take pictures from  
201 individual birds without completely socially isolating them. We collected data from 10 zebra  
202 finches (five males and five females). In each partition, we placed two Raspberry Pi cameras  
203 to photograph (every two seconds) the birds sitting on the wooden perches (Fig. 1d). Each  
204 bird was recorded for four hours. Since we know which Raspberry Pi photographed which  
205 bird, we avoided the need to manually link the identity of the birds to the pictures.

206 Data pre-processing:

207 To efficiently train a CNN, the regions in the pictures corresponding to the birds should be  
208 extracted from the background (second step of Fig. 2). Mask R-CNN (He, Gkioxari, Dollár &  
209 Girshick, 2017) was used to automatically localize and crop the bird out. For the sociable  
210 weavers, we used a Mask R-CNN model that has been trained on Microsoft COCO (Lin et  
211 al., 2014), a generalist dataset which includes pictures of birds and therefore is able to  
212 localize the sociable weavers in the pictures (see  
213 [github.com/AndreCFerreira/Bird\\_individualID](https://github.com/AndreCFerreira/Bird_individualID) for details). For the great tits and zebra finches  
214 this Mask R-CNN model performed poorly and thus the model was re-trained by adding a  
215 new category (zebra finch or great tit, a different model for each species) and using pictures  
216 in which the region corresponding to the bird was manually delimited using “VGG Image

217 Annotator” software (Dutta & Zisserman, 2019). Since manually labelling the regions of  
218 interest is time consuming, we started by training the model for 10 epochs with 200 pictures.  
219 If the model was found to perform badly, additional pictures were manually labelled and  
220 added it to the training dataset. This process was repeated until a satisfactory performance  
221 was achieved. For the great tits 500 pictures were used for training and 125 for validation  
222 (see “Convolutional neural networks” section below for explanation on training and validation  
223 datasets), for the zebra finch we used 400 pictures for training and 100 for validation.

224 From a total of 35 weavers detected at the RFIDs antennas we had 30 individuals with more  
225 than 350 pictures each that were used to train the classifier. In the great tit population, 77  
226 birds were photographed including 10 with more than 350 pictures. These individuals were  
227 used to train a CNN. The remaining five weavers and 67 great tits (with less than 350  
228 pictures) were used to address the issue of working in open areas where new individuals  
229 can constantly be recruited to the study population (see section “New birds” below). For the  
230 zebra finches we used all 10 individuals as our setup resulted in more than 2000 pictures for  
231 each bird.

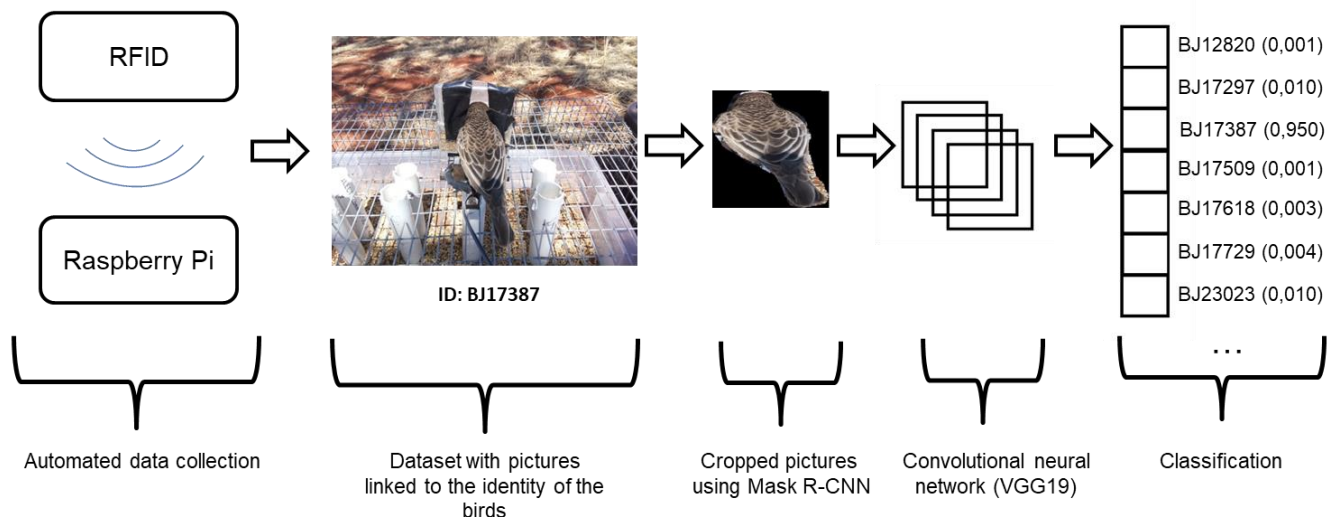

232

233 Figure 2. Sequential steps required for collecting data and training a convolutional neural  
234 network for individual identification.

235 **Convolutional neural networks:**

236 Sociable weavers:

237 For 21 of the 30 selected sociable weavers, more than 1000 pictures were available and  
238 therefore we aimed at using 900 pictures for the training dataset and 100 pictures for  
239 validation dataset. For the 9 sociable weavers, for which we did not have 1000 pictures, we  
240 further avoided an imbalance in the dataset by first selecting 100 pictures for the validation  
241 dataset and then duplicating (through oversampling) the remaining pictures until 900 pictures  
242 were available for the training dataset (Buda, Maki & Mazurowski, 2018). We used 27038  
243 unique pictures,  $901.27 \pm 172.96$  (mean $\pm$ SD) per bird. The training dataset is the set of  
244 samples that the neural network repeatedly uses to learn how to classify the input images  
245 into different classes (in our case, different individuals). The validation dataset is used to  
246 compute the accuracy and loss (estimation of the error during training) of the model. This  
247 validation dataset is used to assess the learning progress of the neural network. As the  
248 network never trains or sees the validation data, this validation dataset can indicate if the  
249 model is overfitting the training data, i.e. if the model is “memorizing” the pictures instead of  
250 learning features that are key for recognizing the individuals.

251 To limit overfitting caused by having very similar pictures in the training and validation  
252 datasets, we used images for training and validation that were taken on different days. All  
253 pictures were normalized by dividing the arrays by 255 (0 to 1 normalization).

254 We used the VGG19 convolutional neural network architecture (Simonyan & Zisserman,  
255 2014) and the weights of a network pre-trained on the ImageNet dataset (a dataset with  
256 more than 14 million pictures and 20000 classes, Deng et al., 2009). The main idea behind  
257 using networks pre-trained on other datasets is that features (such as colour or texture) that  
258 are important to distinguish multiple objects could also be useful to distinguish between  
259 individuals. The fully connected part of the VGG19 CNN network (i.e. the classifier part)  
260 were replaced by layers with random weights that fits our particular task of interest and the  
261 corresponding number of classes (30 individuals).

262 To further increase our training sample, we used data augmentation, which consists of  
263 artificially increasing the sample size by applying transformations to our existing sample.  
264 Using the data generator available in Keras, images were randomly rotated (from 0 to 40°)  
265 and zoomed (zoom range of 0.2). One 0.5 dropout layer was added just before the first  
266 dense layer to limit overfitting (see [github.com/AndreCFerreira/Bird\\_individualID](https://github.com/AndreCFerreira/Bird_individualID) for details  
267 on the network architecture). We used a softmax activation function for the classifier. ADAM  
268 optimizer (Kingma & Ba 2014) was used with a learning rate of 1e-5. A batch size of eight  
269 was used since it has been shown that small batch sizes improve models' generalization  
270 capability (Masters & Luschi, 2018). If there was no decrease in loss for more than 10  
271 consecutive epochs we stopped training, and then retrained the model that achieved the  
272 lowest loss with a SGD optimizer and a learning rate 10 times smaller until there was no  
273 further decrease in the loss for more than 10 consecutive epochs. All analyses were  
274 conducted with python 3.7 using keras tensorflow 1.9, and on nvidia rtx 2070 gpu.

275 In an exploratory approach, and even though our model achieved ca. 90% accuracy with the  
276 validation dataset, the accuracy was significantly lower when generalizing to other contexts  
277 (see results). We suspected that such differences could be due to the lower quality of  
278 pictures collected in those other contexts (with different cameras, capture distances and  
279 conditions; see "Testing models" section). To account for this possibility we trained a model  
280 using the same setting parameters that yielded the best results, but applying Gaussian blur,  
281 motion blur, Gaussian noise and resizing transformations and a random combination of two  
282 of these four transformations (see [github.com/AndreCFerreira/Bird\\_individualID](https://github.com/AndreCFerreira/Bird_individualID) for details  
283 on the transformations applied to the images) to each of the pictures of the dataset used to  
284 train the models in order to simulate the lower quality of the pictures taken in other contexts  
285 (Fig. 3). The idea is that even if the overall quality of the pictures in the dataset used for  
286 training slightly differs from pictures which are of interest for a research question, this  
287 training dataset can be transformed in order to be more similar to the pictures collected in  
288 distinct contexts for which the classifier could be applied on.

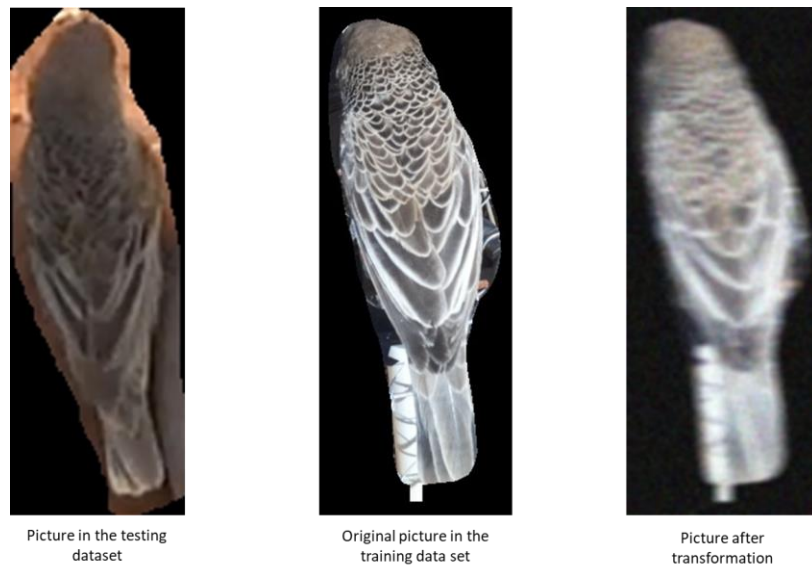

289

290 Figure 3. Comparison of the pictures' quality in the testing dataset (on the left, see "Testing  
291 models" section below) with the training dataset (middle). On the right the same training  
292 pictures after applying a transformation to simulate the low-quality of the testing dataset.

293

#### 294 Great tits:

295 For the great tits we trained the CNN with 1000 pictures per bird, 900 pictures for training  
296 and 100 for validation. For birds with less than 1000 pictures (six birds) we did oversampling  
297 by creating copies of the pictures available following the same procedures as for the  
298 sociable weaver. We used 7605 unique pictures,  $760.50 \pm 222.56$  (mean  $\pm$  SD) per bird.  
299 Pictures in the validation dataset were also taken in different days from the pictures used for  
300 training.

301 The same architecture and hyperparameters as for sociable weavers were used, except that  
302 the dropout value was reduced to 0.2 as the model did not improve the accuracy from a  
303 random guess for 10 epochs when the dropout was at an initial value of 0.5. In addition to  
304 the zooming and rotation data transformations, horizontal and vertical flips were also used  
305 as the great tits, contrary to the sociable weavers, could be photographed from any  
306 orientation (as they perched all around the RFID antenna). Blur and noise transformations

307 were not used as there were no differences in the overall quality of the pictures used for  
308 training and for testing the model generalization capability (see “Testing models” section).

### 309 Zebra finches:

310 There were more pictures available per bird for the zebra finch than for the other species.  
311 However, the problem of collecting pictures in animals that are in confined enclosures is that  
312 a significant number of pictures could potentially be near-identical if the individuals stay  
313 motionless for long periods of time. In our case, all birds were generally active and visited all  
314 the places in their cage (i.e. all wooden perches, floor, water and food plates). Nevertheless,  
315 to avoid potential overestimation of the model’s accuracy, we used the pictures collected  
316 when the birds were in the left side of the cage for training and the pictures taken when the  
317 birds were on the right side of the cage for validation. Additionally, to create a diverse set of  
318 validation pictures, structural-similarity index measure (SSIM) (Wang, Bovik, Sheikh &  
319 Simoncelli, 2004) was used to make pairwise similarity comparisons between pictures. We  
320 started by randomly selecting a picture to include in the validation dataset. Additional  
321 pictures were then randomly sampled and used to compute the SSIM between the new  
322 picture and the ones already in the validation dataset and if the value was smaller than a  
323 threshold, these new pictures were included in the validation dataset. This process was  
324 repeated by sequentially comparing a new picture to all the ones already in the validation  
325 dataset until we reached 160 pictures per bird. The threshold value used (0.55) was  
326 empirically determined by trying different values and looking at the resulting datasets. For  
327 the training dataset, 1600 pictures of each bird were randomly selected without filtering for  
328 near-identical pictures. All birds had at least 1600, except for one that had 1197 for which  
329 oversampling was used by creating duplicates of randomly sampled 403 pictures.

330 Finally, the CNN was trained using the same procedures as for the great tits except that the  
331 dropout layer was set to 0.5 rather than 0.2.

### 332 Testing models:

333 Sociable weavers:

334 To test the efficiency of our models, we collected images of the sociable weavers in different  
335 viewing perspectives, using different cameras and different contexts than the original feeding  
336 station setup. The aim was to evaluate the ability of our trained CNN to identify individuals in  
337 different experiments and contexts.

338 We used four different setups for testing. We filmed birds feeding in the same plastic RFID  
339 feeders but recorded using a Sony handycam (rather than Raspberry Pi camera), from two  
340 different perspectives: 1) close (95 pictures from 26 birds  $3.65 \pm 0.68$  (mean  $\pm$  SD; Fig. 4a)  
341 and 2) and far (71 pictures from 21 birds  $3.43 \pm 0.58$ ; Fig. 4b). In addition, a plastic round  
342 feeder with seeds was positioned on the floor to record both from 3) a ground perspective  
343 (90 pictures from 28 birds  $3.21 \pm 1.21$ ; Fig. 4c) and 4) a top perspective (83 pictures from 25  
344 birds  $3.32 \pm 1.01$ ; Fig. 4d).

345 The birds were manually cropped out from pictures using imageJ (Schneider, Rasband &  
346 Eliceiri, 2012) and individually identified using their colour rings. The colour rings were then  
347 erased directly from the image to guarantee that the model did not use them for  
348 identification. Videos were recorded within the same time window as the training pictures  
349 collection and we aimed at extracting five non-identical frames per bird in which the back  
350 was fully visible, however this was not always possible for all birds as not all of them were  
351 recorded in these testing videos, or were not recorded long enough.

(a)

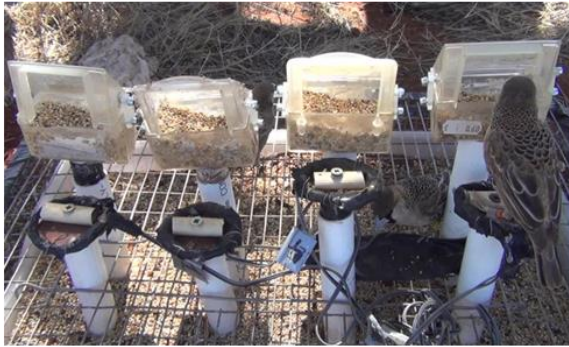

(b)

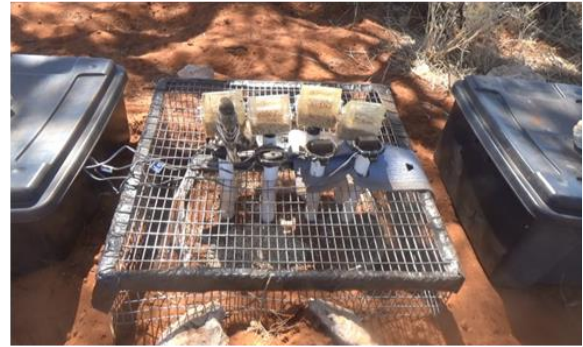

(c)

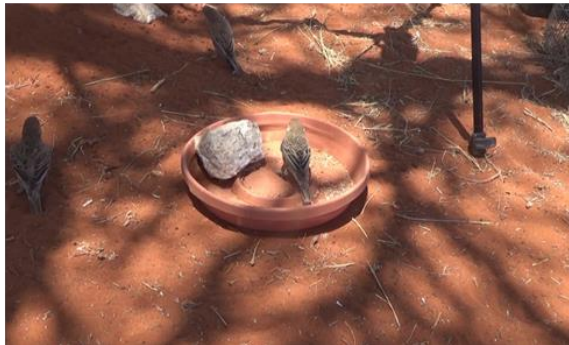

(d)

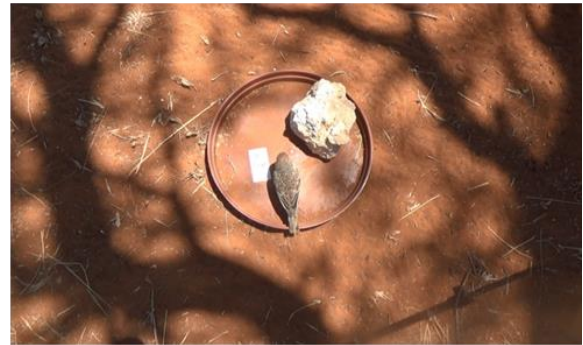

352

353 Figure 4. Example of pictures from the four different conditions used for the testing that were  
354 recorded at the feeders from the RIFD feeder setup from: a) close or b) far perspective, or  
355 directed at a feeding plate on the floor recorded from c) a ground perspective and d) a top  
356 perspective.

### 357 Great tits:

358 We recorded birds feeding in a table from a top perspective with a Raspberry Pi camera  
359 (Fig. 5). Since these birds had no colour ring or any mark for visual identification, we  
360 identified them using their pit-tags by placing seeds on top of a RFID antenna in order to  
361 induce the birds to activate the RIFD antenna and obtain the identity of the birds feeding  
362 (similar to the pictures collected for training described above). Birds were recorded feeding  
363 on the table for 3 days but 4 out of the 10 birds in the training dataset did not use this new  
364 feeding spot. Additionally the number of pictures collected at this setup varied greatly  
365 between birds (from 2 to 38 pictures, mean:  $15.7 \pm 11.3SD$ ). We did not attempt to make a



366 balanced dataset and, therefore, used all the 94 pictures collected at this new feeding set-  
367 up.

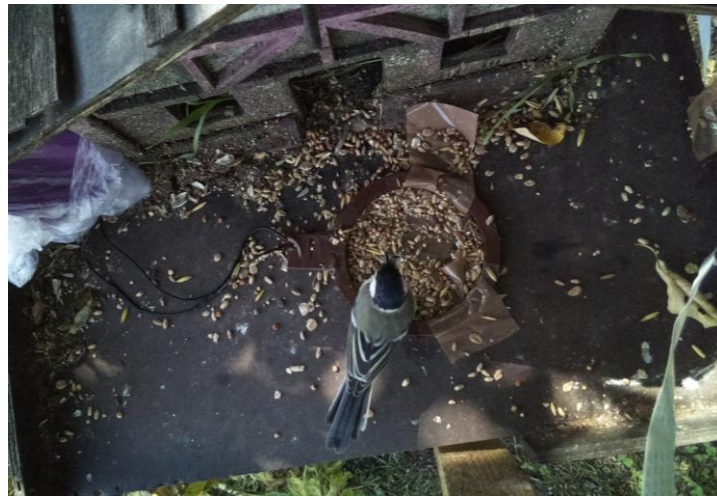

368

369 Figure 5. Great tit recorded from a top perspective feeding at a table on top of a RFID  
370 antenna.

371 Zebra finches:

372 For the zebra finches we did not have a second setup that differed from the one used to  
373 collect the pictures to train a CNN and that could be used for testing the CNN generalization.  
374 Therefore, we ran an additional trial which consisted of recording the birds together to see  
375 how well the model would predict the identity of the birds when they are in small groups,  
376 interacting with each other (Fig. 6). Since these birds did not have any visual tags and it was  
377 not possible to distinguish them when in group, we used one flock of three birds and another  
378 flock of two birds for each sex to estimate the model's accuracy by calculating the number of  
379 times that the CNN wrongly attributed the identity of a bird as being an individual that is not  
380 effectively present in that flock. In order to avoid near-identical pictures, the same procedure  
381 as for the validation dataset to select 160 pictures from each trial was used.

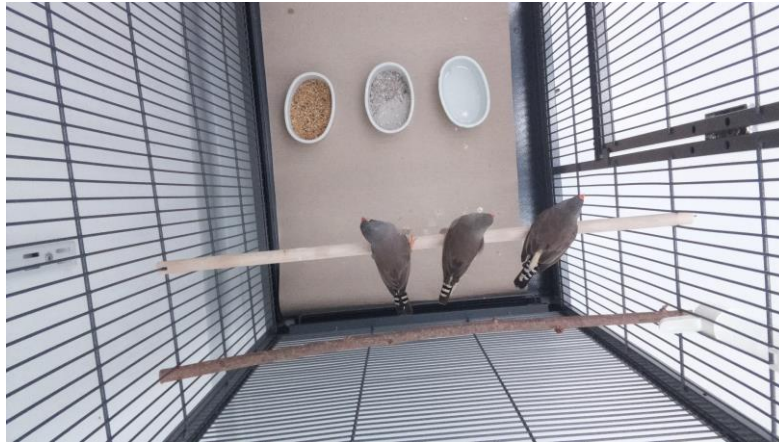

382

383

Figure 6. Example of a picture used for the zebra finches' testing dataset.

384 **New birds:**

385

In wild populations, new individuals can join the population during the course of a study.

386

These new individuals may challenge the performance of a CNN because the model outputs

387

a vector from a softmax layer that indicates probabilities of presence for every individual

388

present during training and the sum of these probabilities is one (see "classification" stage in

389

Fig. 2). In order to study this potential issue we used the already trained CNNs to predict the

390

identity of birds that were not in the training dataset. For the sociable weavers, a scenario in

391

which a CNN was trained to identify a relatively large number of individuals (30) was used to

392

expose the obtained CNN to a small number of new individuals (5). For the great tits the

393

opposite scenario was tested by using a CNN that was trained for a small group of

394

individuals (10) and is exposed to a large number of new individuals (67). For the sociable

395

weavers, we selected 50 pictures of each of the five birds (a total of 250) that were not in the

396

training dataset and 250 random pictures from the pool of birds used during training. For the

397

great tits 250 random pictures were selected from the pool of 67 individuals that were not in

398

the training dataset. We limited the number of pictures from the same individual to a

399

maximum of eight ( $3.91 \pm 1.67$  mean  $\pm$  SD) in order to keep a large number of different

400

individuals in this dataset (64 out of the 67 were used) and randomly selected 250 pictures

401

from the 10 individuals for which the CNN was trained. Shannon's entropy of each of the

402 distributions was calculated from the classification (softmax) output to empirically determine  
403 a confidence threshold to consider a bird as part of the training dataset.

## 404 **RESULTS:**

### 405 **CNN:**

#### 406 Sociable weavers:

407 The model was able to achieve an accuracy of 92.4% (Table 1) after training for 21 epochs.  
408 When the model was used to predict the identity in four other contexts, it appears that the  
409 accuracy of top perspective's context was lower (67.5%). After adding blur and noise to the  
410 training images, the model achieved a validation accuracy of 90.3%, while successfully  
411 increasing the accuracy from the top perspective to 91.6% (Table 1).

412 Table 1. Rate of positive identification when testing in all contexts for the sociable weavers.

413 Right column gives the identification success rate when noise and blurs were artificially  
414 added to training images to match the quality of testing images.

| Perspective | Positive identification | Positive identification after adding blur and noise |
|-------------|-------------------------|-----------------------------------------------------|
| Validation  | 0.924                   | 0.903                                               |
| Close       | 0.926                   | 0.926                                               |
| Far         | 0.958                   | 0.972                                               |
| Ground      | 0.867                   | 0.944                                               |
| Top         | 0.675                   | 0.916                                               |

415

#### 416 Great tits:

417 The model reached 90.0% accuracy after training for 32 epochs. When using the pictures  
418 from the top perspective recording the birds on the table the model correctly predicted the  
419 identity of the birds in 85.1% of the pictures.

420 Zebra finches:

421 The model reached 87.0% accuracy after training for 11 epochs with similar accuracies for  
422 males and females (85% for males, 88.9% for females). When using the trained model to  
423 predict the identity of the birds when they were in small groups the model correctly predicted  
424 the identity of a bird present in that group in 93.6% of the time.

425 New birds:

426 The entropy of the softmax outputs (i.e. probabilities) was smaller when predicting the  
427 identity of birds present in the training dataset, compared to when predicting the identity of  
428 new birds (Fig. 7). This is due to the fact that when predicting the identity of a bird from the  
429 training dataset, there is usually one that stands out with very high probability (indicating the  
430 bird's identity) and the remaining probabilities are very low (other birds' identities). In  
431 contrast, when predicting the identity of a new bird, the probabilities were usually more  
432 equally distributed across all classes, all with low values.

433 For the sociable weavers 90% of entropies are below 0.75 when predicting the identity of  
434 birds from the training dataset and only 17% of them are under this value when predicting  
435 the identity of new birds. This means that with this 0.75 threshold there is a 17% chance that  
436 a new bird will be erroneously classified as one of the birds of the training dataset. A value of  
437 17% should be acceptable if new individuals are not common.

438 For the great tits scenario, in which the appearance of new birds is frequent, defining a  
439 simple threshold would not be enough as there is a too much overlap between the birds in  
440 the training and the new birds' entropy.

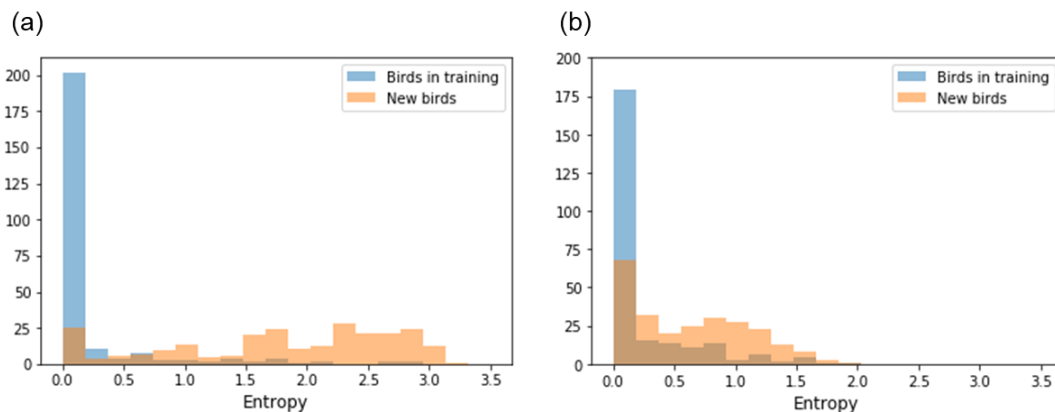

441

442 Figure 7. Distribution of the entropies of softmax probabilities when predicting the identity of  
443 birds from the training dataset or of new birds for a) sociable weavers and b) great tits.

#### 444 **DISCUSSION:**

445 Deep learning has the potential to revolutionize the way in which researchers identify  
446 individuals. Here, we propose a practical way of collecting large labelled datasets, which is  
447 currently identified as the main bottleneck preventing the application of deep learning for  
448 individual identification in animals (Schneider, Taylor, Linquist & Kremer, 2018). We also  
449 demonstrate the steps required to train a classifier for individual identification. To our  
450 knowledge, this is the first successful attempt of performing such an individual recognition in  
451 small birds. Using data collected with automatized procedures, CNNs proved to be effective  
452 for identifying individuals in three different bird species, including two species that are among  
453 the most commonly used models in the field of behavioural ecology, and therefore such  
454 results highlight the potential of applying CNN to a vast range of research projects.  
455 Furthermore, we found high generalization capacities of the trained CNNs, meaning that the  
456 rate of successful identification remained high in various contexts. This is particularly  
457 relevant as researchers often need to collect data in contexts that may be challenging, from  
458 parental behaviour at the nest to dominance interactions at artificial feeders. However, we  
459 also show that the models' performance can become lower when new individuals join the  
460 population, especially when new individuals are common. .

461 The first critical step when attempting to implement deep learning is to guarantee that  
462 enough training data can be collected to train a model. In this study, for the two wild  
463 populations, we showed that we can rely on RFID technology to gather large amounts of  
464 automatically labelled data. Since this technology has been increasingly used on birds, we  
465 believe that the proposed method for automatizing data collection for deep learning  
466 applications could be easily and rapidly implemented in a large number of research  
467 programs. Furthermore, the method could be easily extended to other animals and other  
468 identification techniques. The main idea is to develop a framework in which the same  
469 individuals can be repeatedly photographed, while those pictures are automatically labelled.  
470 For example, GPS (e.g., Weerd et al., 2015) or proximity tags technology (e.g., Levin,  
471 Zonana, Burt & Safran, 2015) could also be used in combination with camera traps to collect  
472 training data. Even with non-electronic tags, it should be possible to design setups to  
473 photograph animals automatically, such as by isolating the animals as we showed here with  
474 the zebra finches. With the popularization of imaging and sensor technologies, we believe  
475 that efficiently collecting a large amount of data should no longer represent a bottleneck  
476 preventing the application of deep learning methods such as CNN.

477 Variation in the recording conditions, for example due to light intensity, shadow or  
478 characteristics inherent to the recording quality, should also be taken under consideration as  
479 it could limit the model generalization and application ability. Photographing the animals  
480 across different times of the day and in different days provides the CNN with a very diverse  
481 training dataset making the CNN invariant to such variations. Furthermore, we show here  
482 that if the conditions for training are slightly different from the recording conditions in which  
483 the CNN is going to be applied, it is possible to artificially modify the pictures used for  
484 training in order to simulate the conditions under which the pictures of the context of interest  
485 will be taken. Specifically, we used blur and noise transformations in the sociable weaver  
486 dataset to improve the generalization capability of our model as the testing images had a  
487 lower quality. This confirms that using artificially degraded training pictures can be used to

488 improve CNN generalization capability (e.g. Vasiljevic, Chakrabarti & Shakhnarovich, 2016).  
489 Other transformations could potentially be applied on the training dataset. Such  
490 transformations should consider the type of images on which the model will be used. For  
491 example, if illumination conditions of the training pictures are different from the context of  
492 interest, brightness and contrasts transformations could be applied to the training data in  
493 order to make the CNN light invariant. This generalization capability is an important novelty  
494 of this study compared to previous work on small-animal tracking using computer vision,  
495 which have been restricted to standardized conditions and to a fixed number of individuals  
496 determined beforehand (e.g. Pérez-Escudero et al., 2014), which are not feasible when  
497 working with wild animal populations.

498 For research questions that do not need long time windows of data collection or that are  
499 conducted on species that maintain their appearance with great consistency, collecting  
500 training data within a short-period of time might be enough for developing an algorithm for  
501 individual identification. However, for longer-term studies and when working with species  
502 that have the potential to change their appearance (e.g. moulting in birds), this constitutes a  
503 potentially serious limitation. The problem of long-term application of neural network  
504 algorithms has been studied in the context of place recognition (e.g. streets recognitions;  
505 Gomez-Ojeda et al., 2015); however, to our knowledge, there is still no study addressing the  
506 impact of changes in appearance in animals in deep learning-based identification. Currently,  
507 we do not know if using training data collected during long periods of time or targeting  
508 specific parts (e.g. excluding the wing feathers and considering only the top part of the back,  
509 or other body parts such as the flank or the bib) of the birds would make the CNN  
510 appearance-invariant by learning more conservative features of the birds that are kept  
511 across moulting events. In order to fully address the problem and the potential solutions,  
512 pictures of birds collected over longer periods of time and from multiple body parts are  
513 needed. However, while these datasets are not available, the automatization of training data

514 collection is an immediate and effective solution, i.e. it is possible to continuously collect  
515 training pictures and routinely re-train the CNNs using the new updated dataset.

516 The arrival of new individuals to the study population is another challenge that needs to be  
517 carefully addressed. If these new birds are marked with a pit-tag, the CNN could be updated  
518 similarly to the problem of changes in appearance discussed above. If the new individuals  
519 are not marked and cannot be captured the problem fits in the anomaly (Chandola, Banerjee  
520 & Kumar, 2009) and novelty (Pimentel, Clifton, Clifton & Tarassenko, 2014) detection  
521 domain. Here we used a simple approach based on the entropy of classification  
522 probabilities, which appeared useful if the CNN was trained on a relatively large number of  
523 individuals and if immigrants are uncommon in the population, like in the sociable weaver  
524 example. Moreover, the error rate might be reduced if the identification is based on a  
525 collection of frames (e.g. pictures extracted from a short video recording of the animal)  
526 instead of single picture. However, for some studies, such conditions might not be met and,  
527 as we showed for the great tit scenario, where we had a low number of individuals in the  
528 training dataset and observed a large number of new birds, other approaches have to be  
529 explored when sufficient individual data is available (for example by using Siamese neural  
530 networks; Varior, Haloi & Wang, 2016). The field of deep learning progresses due to the  
531 existence of large and freely availed databases which are used to try different approaches  
532 for a wide range of classification problems. For example, the ImageNet database (Deng et  
533 al., 2009) has been used numerous times to create algorithms for object recognition. The  
534 LFW dataset (Huang, Mattar, Berg & Learned-Miller, 2008) contains thousands of pictures of  
535 human faces to development algorithms for human face recognition and identification. The  
536 nordland dataset (Sünderhauf, Neubert & Protzel, 2013) contains footage of more than  
537 700km of northern Norway railroad recorded in different seasons (summer, winter, spring  
538 and fall) and has been used to address the problem of place recognition under severe  
539 environmental changes. Similarly, biologists aiming at taking advantage of the potential of  
540 deep learning need large datasets with labelled pictures of several individuals, taken across



541 different contexts and across different life stages, in order to develop reliable algorithms that  
542 are able to cope with the challenges presented here, among others.

543 Having large datasets will also allow optimizing the CNN performances. Other network  
544 architectures (e.g. ResNet; He, Zhang, Ren & Sun, 2016) and different hyper-parameters  
545 settings (e.g. learning rate) than the ones used here can yield different, and potentially  
546 improved, results. There are also other pre-processing steps that can greatly improve the  
547 model training and reduce the number of images needed such as, image alignment (e.g.  
548 Deb et al., 2018; Lopes, de Aguiar, De Souza, & Oliveira-Santos, 2017), which could be  
549 used to decrease variation in the birds' pose. Training a CNN encompasses a great deal of  
550 trial and error and different systems will present different challenges. Nonetheless, we hope  
551 that our work will motivate other researchers to start exploring the possibility of using deep  
552 learning for individual identification in their model species, and conduct further work on  
553 addressing the constraints of working with birds both in the wild and in captivity (namely  
554 moulting and introduction of new individuals). The ability to move beyond visual marks and  
555 manual video coding will revolutionise many of the questions we can address by making  
556 data collection more efficient, cheaper and faster.

## 557 **ACKNOWLEDGEMENTS**

558 Data collection on the sociable weaver population would have not been possible without the  
559 contribution of several people working in the field, in particular those who contributed to  
560 operate the RFID stations and conduct the annual sociable weavers captures: António  
561 Vieira, Rita Fortuna, Pietro D'Amelio, Cecile Vansteenbergh, Franck Theron, Annick Lucas,  
562 Sam Perret, and several other volunteers. De Beers Consolidated Mines gave us permission  
563 to work at Benfontein Reserve. We also thank Gustavo Alarcón-Nieto and Adriana  
564 Maldonado-Chaparro for the assistance with the material needed to collect pictures of the  
565 great tits and the zebra finches. Data collection for the sociable weaver data was supported  
566 by funding from the FitzPatrick Institute of African Ornithology (DST-NRF Centre of

567 Excellence) at the University of Cape Town (South Africa), FCT (Portugal) through grants  
568 IF/01411/2014/CP1256/CT0007 and PTDC/BIA-EVF/5249/2014 to RC and the French ANR  
569 (Projects ANR- 15-CE32-0012-02 and ANR 19-CE02-0014-02) to CD. This work was  
570 conducted under the CNRS-CIBIO Laboratoire International Associé (LIA). ACF was funded  
571 by FCT SFRH/BD/122106/2016. FR was funded by national funds through FCT – Fundação  
572 para a Ciência e a Tecnologia, I.P., under the Scientific Employment Stimulus - Individual  
573 Call - CEECIND/01970/2017. This work benefited from a grant by the Deutsche  
574 Forschungsgemeinschaft (DFG grant FA 1402/4-1) awarded to DRF. DRF and HBB  
575 received additional funding by the Max Planck Society and the DFG Centre of Excellence  
576 2117 "Centre for the Advanced Study of Collective Behaviour" (ID: 422037984).

#### 577 **AUTHORS' CONTRIBUTIONS**

578 ACF, LRS, CD and JPR had the idea of applying deep learning for individual identification in  
579 the sociable weaver population and DRF had the idea of applying it to the zebra finch and  
580 great tit populations. ACF and LRS developed the RFID and Raspberry Pi based method for  
581 automated training data collection. LRS analysed the sociable weaver videos for testing the  
582 model generalization capability. RC and CD provided all the required funding, material and  
583 access to the individually marked sociable weaver population and DRF to the great tit and  
584 zebra finch populations. ACF, HBB and DRF developed the setup to collect pictures of the  
585 zebra finches. ACF, HBB collected the data of the zebra finches. ACF collected the data for  
586 the sociable weaver and the great tit populations. ACF led the statistical analysis and data  
587 pre-processing assisted by FR and JPR. ACF wrote the first draft of the manuscript. All  
588 authors contributed to editing and revising the final manuscript.

589

#### 590 **DATA ACCESSIBILITY**

591 All scripts and data for reproducing the entire contents of this article are available at  
592 [https://github.com/AndreCFerreira/Bird\\_individualID](https://github.com/AndreCFerreira/Bird_individualID).

593 **REFERENCES:**

- 594 Alarcón-Nieto, G., Graving, J. M., Klarevas-Irby, J. A., Maldonado-Chaparro, A. A., Mueller,  
595 I., & Farine, D. R. (2018) An automated barcode tracking system for behavioural studies in  
596 birds. *Methods in Ecology and Evolution*, 9(6), 1536-1547.
- 597 Angermueller, C., Pärnamaa, T., Parts, L., & Stegle, O. (2016) Deep learning for  
598 computational biology. *Molecular systems biology*, 12(7), 878.
- 599 Aplin, L. M., Farine, D. R., Morand-Ferron, J., Cockburn, A., Thornton, A., & Sheldon, B. C.  
600 (2015) Experimentally induced innovations lead to persistent culture via conformity in wild  
601 birds. *Nature*, 518, 538-541.
- 602 Buda, M., Maki, A., & Mazurowski, M. A. (2018) A systematic study of the class imbalance  
603 problem in convolutional neural networks. *Neural Networks*, 106, 249-259.
- 604 Chandola, V., Banerjee, A., & Kumar, V. (2009) Anomaly detection: A survey. *ACM*  
605 *computing surveys (CSUR)*, 41(3), 15.
- 606 Christin S, Hervet É, Lecomte N. (2019) Applications for deep learning in ecology. *Methods*  
607 *in Ecology Evolution*. 00:1–13
- 608 Clutton-Brock, T., & Sheldon, B. C. (2010) Individuals and populations: the role of long-term,  
609 individual-based studies of animals in ecology and evolutionary biology. *Trends in ecology &*  
610 *evolution*, 25(10), 562-573.
- 611 Covas, R., Du Plessis, M. A., & Doutrelant, C. (2008) Helpers in colonial cooperatively  
612 breeding sociable weavers *Philetairus socius* contribute to buffer the effects of adverse  
613 breeding conditions. *Behavioral Ecology and Sociobiology*, 63, 103-112
- 614 Deb, D., Wiper, S., Russo, A., Gong, S., Shi, Y., Tymoszek, C., & Jain, A. (2018) Face  
615 recognition: Primates in the wild. arXiv preprint arXiv:1804.08790

- 616 Deng, J., Dong, W., Socher, R., Li, L. J., Li, K., & Fei-Fei, L. (2009) Imagenet: A large-scale  
617 hierarchical image database. IEEE Conference on Computer Vision and Pattern Recognition  
618 (CVPR) (pp. 248–255). IEEE.
- 619 Dutta, A., & Zisserman, A. (2019) The VGG image annotator (VIA). arXiv preprint  
620 arXiv:1904.10699.
- 621 Gomez-Ojeda, R., Lopez-Antequera, M., Petkov, N., & Gonzalez-Jimenez, J. (2015) Training  
622 a convolutional neural network for appearance-invariant place recognition. arXiv preprint  
623 arXiv:1505.07428.
- 624 Hansen, M. F., Smith, M. L., Smith, L. N., Salter, M. G., Baxter, E. M., Farish, M., & Grieve,  
625 B. (2018) Towards on-farm pig face recognition using convolutional neural networks.  
626 *Computers in Industry*, 98, 145-152.
- 627 He, K., Gkioxari, G., Dollár, P., & Girshick, R. (2017) Mask r-cnn. In Proceedings of the IEEE  
628 international conference on computer vision (pp. 2961-2969).
- 629 He, K., Zhang, X., Ren, S., & Sun, J. (2016) Deep residual learning for image recognition. In  
630 Proceedings of the IEEE conference on computer vision and pattern recognition (pp. 770-  
631 778).
- 632 Huang, G. B., Mattar, M., Berg, T., & Learned-Miller, E. (2008) Labeled faces in the wild: A  
633 database for studying face recognition in unconstrained environments.
- 634 Jordan, M. I., & Mitchell, T. M. (2015) Machine learning: Trends, perspectives, and  
635 prospects. *Science*, 349(6245), 255-260.
- 636 LeCun, Y., Bengio, Y., & Hinton, G. (2015) Deep learning. *Nature*, 521(7553), 436.
- 637 Levin, I. I., Zonana, D. M., Burt, J. M., & Safran, R. J. (2015) Performance of encounternet  
638 tags: field tests of miniaturized proximity loggers for use on small birds. *PloS one*, 10(9),  
639 e0137242.

- 640 Lin, T. Y., Maire, M., Belongie, S., Hays, J., Perona, P., Ramanan, D., ... Zitnick, C. L.  
641 (2014) Microsoft COCO: Common objects in context. In D. Fleet, T. Pajdla, B. Schiele, & T.  
642 Tuytelaars (Eds.), *European conference on computer vision* (pp. 740–755). Cham: Springer
- 643 Lopes, A. T., de Aguiar, E., De Souza, A. F., & Oliveira-Santos, T. (2017) Facial expression  
644 recognition with convolutional neural networks: coping with few data and the training sample  
645 order. *Pattern Recognition*, 61, 610-628.
- 646 Kingma, D. P., & Ba, J. (2014) Adam: A method for stochastic optimization. arXiv preprint  
647 arXiv:1412.6980.
- 648 Körschens, M., Barz, B., & Denzler, J. (2018) Towards automatic identification of elephants  
649 in the wild. arXiv preprint arXiv:1812.04418.
- 650 Krause, J., Krause, S., Arlinghaus, R., Psorakis, I., Roberts, S., & Rutz, C. (2013). Reality  
651 mining of animal social systems. *Trends in ecology & evolution*, 28(9), 541-551.
- 652 Marcus, G. (2018) Deep learning: A critical appraisal. arXiv preprint arXiv:1801.00631.
- 653 Masters, D., & Luschi, C. (2018) Revisiting small batch training for deep neural networks.  
654 arXiv preprint arXiv:1804.07612.
- 655 Norouzzadeh, M. S., Nguyen, A., Kosmala, M., Swanson, A., Palmer, M. S., Packer, C., &  
656 Clune, J. (2018) Automatically identifying, counting, and describing wild animals in camera-  
657 trap images with deep learning. *Proceedings of the National Academy of Sciences*, 115(25),  
658 E5716-E5725.
- 659 Pérez-Escudero, A., Vicente-Page, J., Hinz, R. C., Arganda, S., & De Polavieja, G. G. (2014)  
660 idTracker: tracking individuals in a group by automatic identification of unmarked animals.  
661 *Nature methods*, 11(7), 743.
- 662 Pimentel, M. A., Clifton, D. A., Clifton, L., & Tarassenko, L. (2014) A review of novelty  
663 detection. *Signal Processing*, 99, 215-249.

- 664 Ranjan, R., Sankaranarayanan, S., Bansal, A., Bodla, N., Chen, J. C., Patel, V. M., ...  
665 Chellappa, R. (2018) Deep learning for understanding faces: Machines may be just as good,  
666 or better, than humans. *IEEE Signal Processing Magazine*, 35(1), 66-83.
- 667 Romero-Ferrero, F., Bergomi, M. G., Hinz, R. C., Heras, F. J., & de Polavieja, G. G. (2019)  
668 idtracker. ai: tracking all individuals in small or large collectives of unmarked animals. *Nature*  
669 *methods*, 16(2), 179.
- 670 Rzanny, M., Seeland, M., Wäldchen, J., & Mäder, P. (2017) Acquiring and preprocessing  
671 leaf images for automated plant identification: understanding the tradeoff between effort and  
672 information gain. *Plant methods*, 13(1), 97.
- 673 Schneider, C. A., Rasband, W. S. & Eliceiri, K. W. (2012) NIH Image to ImageJ: 25 years of  
674 image analysis, *Nature methods* 9(7): 671-675
- 675 Schneider, S., Taylor, G. W., Linqvist, S., & Kremer, S. C. (2019) Past, present and future  
676 approaches using computer vision for animal re-identification from camera trap data.  
677 *Methods in Ecology and Evolution*, 10(4), 461-470.
- 678 Simonyan, K., & Zisserman, A. (2014) Very deep convolutional networks for large-scale  
679 image recognition. arXiv preprint arXiv:1409.1556.
- 680 Sünderhauf, N., Neubert, P., & Protzel, P. (2013) Are we there yet? Challenging SeqSLAM  
681 on a 3000 km journey across all four seasons. In Proc. of Workshop on Long-Term  
682 Autonomy, IEEE International Conference on Robotics and Automation (ICRA).
- 683 Tabak, M. A., Norouzzadeh, M. S., Wolfson, D. W., Sweeney, S. J., VerCauteren, K. C.,  
684 Snow, N. P., ... Teton, B. (2019) Machine learning to classify animal species in camera trap  
685 images: applications in ecology. *Methods in Ecology and Evolution*, 10(4), 585-590.

- 686 Varior, R. R., Haloi, M., & Wang, G. (2016) Gated siamese convolutional neural network  
687 architecture for human re-identification. In European conference on computer vision (pp.  
688 791-808). Springer, Cham.
- 689 Vasiljevic, I., Chakrabarti, A., & Shakhnarovich, G. (2016) Examining the impact of blur on  
690 recognition by convolutional networks. arXiv preprint arXiv:1611.05760.
- 691 Wang, Z., Bovik, A. C., Sheikh, H. R., & Simoncelli, E. P. (2004) Image quality assessment:  
692 from error visibility to structural similarity. *IEEE transactions on image processing*, 13(4),  
693 600-612.
- 694 de Weerd, N., van Langevelde, F., van Oeveren, H., Nolet, B. A., Kölzsch, A., Prins, H. H., &  
695 de Boer, W. F. (2015) Deriving animal behaviour from high-frequency GPS: tracking cows in  
696 open and forested habitat. *PloS one*, 10(6), e0129030.
- 697 Weinstein, B. G. (2018) A computer vision for animal ecology. *Journal of Animal Ecology*,  
698 87(3), 533-545.
